# Supplementary material for: The Impact of Care Bundles on Ventilator-Associated Pneumonia (VAP) Prevention in Adult ICUs: A Systematic Review
Source: MDPI journal article supplement (doi:10.3390/antibiotics12020227), 2023-01-20
Supplement: s1 [file s1]

**Supplementary Table S2.** Impact of multidisciplinary educational program in the reviewed studies.

| ID | Reference                 | Education Program                                                                                                                                                                                                                                                                                                           | % of program/ bundle compliance                                                                                                                                                                                                                                                                                                                                                                                                                                                                                                                                                       |
|----|---------------------------|-----------------------------------------------------------------------------------------------------------------------------------------------------------------------------------------------------------------------------------------------------------------------------------------------------------------------------|---------------------------------------------------------------------------------------------------------------------------------------------------------------------------------------------------------------------------------------------------------------------------------------------------------------------------------------------------------------------------------------------------------------------------------------------------------------------------------------------------------------------------------------------------------------------------------------|
| 1. | Bouadma et al. (2010)     | <ul style="list-style-type: none"> <li>• a multidisciplinary task force</li> <li>• an educational session direct observation with performance feedback</li> <li>• technical improvements and reminders. Compliance consisted of 5 4-week periods (before the intervention and 1,6,12 &amp; 24 months thereafter)</li> </ul> | <p>Hand-hygiene &amp; glove-and-gown use compliances were initially high (68% and 80%) and remained stable overtime. Compliance with all other preventive measures was initially low and increased steadily over time (<math>p&lt;0.0001</math>):</p> <ul style="list-style-type: none"> <li>• HOB elevation (5% to 58%)</li> <li>• ETT pressure (40% to 89%)</li> <li>• orogastric tube use (52% to 96%)</li> <li>• gastric overdistension avoidance (20% to 68%)</li> <li>• oral hygiene (47% to 90%)</li> <li>• non-essential tracheal suction elimination (41% to 92%)</li> </ul> |
| 2. | Al – Tawfiq et al. (2010) | <ul style="list-style-type: none"> <li>• VAP Team</li> <li>• Protocol for sedation vacation &amp; assessment to extubate</li> <li>• staff education (presentations, discussions)</li> </ul>                                                                                                                                 | Improved from 20% (first 3 months) to 82% (final 3 months)                                                                                                                                                                                                                                                                                                                                                                                                                                                                                                                            |
| 3. | Bird et al. (2010)        | NA                                                                                                                                                                                                                                                                                                                          | <p>Baseline:</p> <ul style="list-style-type: none"> <li>• 1st SICU:53%</li> <li>• 2nd SICU:63%</li> </ul> <p>After intervention:</p> <ul style="list-style-type: none"> <li>• 1st SICU:91%</li> <li>• 2nd SICU:81%</li> </ul>                                                                                                                                                                                                                                                                                                                                                         |
| 4. | Ban et al. (2011)         | <p>Short-term intervention</p> <ul style="list-style-type: none"> <li>• education</li> <li>• pamphlets</li> </ul>                                                                                                                                                                                                           | NA                                                                                                                                                                                                                                                                                                                                                                                                                                                                                                                                                                                    |

|    |                          |                                                                                                                                                                                                                                    |                                                                                                                                                                               |
|----|--------------------------|------------------------------------------------------------------------------------------------------------------------------------------------------------------------------------------------------------------------------------|-------------------------------------------------------------------------------------------------------------------------------------------------------------------------------|
|    |                          | <ul style="list-style-type: none"> <li>●hand cultures</li> <li>●quiz</li> </ul> <p>Long-term intervention</p> <ul style="list-style-type: none"> <li>●posters</li> <li>●reminders</li> <li>●feedback</li> </ul>                    |                                                                                                                                                                               |
| 5. | Berenholtz et al. (2011) | <p>ICU team was trained through:</p> <ul style="list-style-type: none"> <li>●semimonthly conference calls</li> <li>●semiannual statewide meetings</li> </ul> <p>ICU teams educated their staff</p>                                 | <p>Baseline:32%</p> <p>16-18 months after I: 75%</p> <p>28-30 months after I: 84%</p> <p>(p&lt;0.001)</p>                                                                     |
| 6. | Morris et al. (2011)     | <ul style="list-style-type: none"> <li>●nurses' &amp; medical champions</li> <li>●teaching materials</li> <li>●education sessions</li> <li>●bedside cues</li> <li>●feedback meetings</li> <li>●emails</li> <li>●posters</li> </ul> | Total post compliance: 70%                                                                                                                                                    |
| 7. | Gallagher et al. (2012)  | <p>Formal nurses' education:</p> <ul style="list-style-type: none"> <li>●self – learning packet</li> <li>●web – based educational presentations</li> </ul>                                                                         | NA                                                                                                                                                                            |
| 8. | Moore et al. (2012)      | NA                                                                                                                                                                                                                                 | Ventilator Bundle compliance varied from 91% - 97%                                                                                                                            |
| 9. | Gatell et al. (2012)     | A questionnaire to assess nurses' knowledge in pre- intervention phase. Intervention phase: 8 training sessions for nurses.                                                                                                        | The mean overall number of correct answers in the post – intervention questionnaire was higher than the pre – intervention ( $17.87 \pm 2.69$ vs $15.91 \pm 2.68$ , p=0.002). |

|     |                                 |                                                                                                                                                                                                                        |                                                                                                                                                                                                                                                        |
|-----|---------------------------------|------------------------------------------------------------------------------------------------------------------------------------------------------------------------------------------------------------------------|--------------------------------------------------------------------------------------------------------------------------------------------------------------------------------------------------------------------------------------------------------|
| 10. | Guanche – Garcell et al. (2013) | <ul style="list-style-type: none"> <li>●A manual &amp; a training tool</li> <li>●continuous e-mail</li> <li>●telephone support</li> </ul>                                                                              | Adherence was checked (% were not mentioned)                                                                                                                                                                                                           |
| 11. | Leblebicioglu et al. (2013)     | Training & sessions according to the guidelines developed by the SHEA and IDSA                                                                                                                                         | <ul style="list-style-type: none"> <li>●HOB elevation: from 90.55 to 92% (p=0.52)</li> <li>●Hand hygiene: from 41.94 to 47.61% (p=0.002)</li> </ul>                                                                                                    |
| 12. | Mehta et al. (2013)             | Training & sessions according to the guidelines developed by the SHEA & IDSA                                                                                                                                           | <ul style="list-style-type: none"> <li>●Hand Hygiene: from 77.9 to 82%</li> <li>●HOB elevation: from 92.93 to 97.52%</li> </ul>                                                                                                                        |
| 13. | Micik et al. (2013)             | The team, which was responsible for the intervention, held weekly education sessions on the bundle.                                                                                                                    | NA                                                                                                                                                                                                                                                     |
| 14. | Viana et al. (2013)             | NA                                                                                                                                                                                                                     | Compliance was measured only the 1st month of intervention (93%)                                                                                                                                                                                       |
| 15. | Chen et al. (2014)              | 1-month education program                                                                                                                                                                                              | NA                                                                                                                                                                                                                                                     |
| 16. | Docher et al. (2014)            | VAP prevention team (MICU nursing director, MICU nursing educator, a dedicated respiratory therapist, an infection control nurse) rounded on mechanically ventilated patients twice/ week, using a standard checklist. | NA                                                                                                                                                                                                                                                     |
| 17. | Eom et al. (2014)               | Doctors' & nurses' education protocol for each bundle element                                                                                                                                                          | <p>Pre – I: 41,1%</p> <p>Post – I: 71,8%</p> <ul style="list-style-type: none"> <li>●oral hygiene: 45,6% vs 91.6%</li> <li>●PUD prophylaxis: 83% vs 81,1%</li> <li>●HOB elevation: 65.9% vs 72.9%</li> <li>●DVT prophylaxis: 65.6% vs 77.3%</li> </ul> |
| 18. | Righi et al. (2014)             | NA                                                                                                                                                                                                                     | NA                                                                                                                                                                                                                                                     |

|     |                         |                                                                                                                                                                                               |                                                                                                                                                                                                                                                                                                     |
|-----|-------------------------|-----------------------------------------------------------------------------------------------------------------------------------------------------------------------------------------------|-----------------------------------------------------------------------------------------------------------------------------------------------------------------------------------------------------------------------------------------------------------------------------------------------------|
| 19. | Ismail et al. (2015)    | A training session was conducted followed by a demonstration to VAP prevention bundle practices.                                                                                              | DVT and PUD prophylaxis, daily sedation, daily assessment of the readiness to wean, utilizing chlorhexidine for oral care and suctioning the subglottic region, significantly increased after training, from 72.74%, 79.54%, 12.89%, 22.25%, 3.54%, 50% and 75% to 100% ( $p<0.05$ ), respectively. |
| 20. | Lim et al. (2015)       | A bedside VAP bundle quality rounding checklist. A multidisciplinary teamwork was involved in the VAP bundle.                                                                                 | The compliance rates between before and after of this education were 92.4% vs 99.1% (doctor group), 72.2% vs 89.3% (nurse group) and 62.2% vs 84.0% (respiratory therapist group).                                                                                                                  |
| 21. | Zeng et al. (2015)      | NA                                                                                                                                                                                            | Completion rates for each intervention was > 98%                                                                                                                                                                                                                                                    |
| 22. | Alcan et al. (2016)     | 3 phases:<br><br>●1st: determine the VAP care bundle adherence of ICU nurses<br><br>●2nd: education was provided<br><br>●3rd: the effect of VAP care bundle after education was investigated. | The nurses' VAP care bundle adherence improved after education from 10.8% to 89.9% ( $p=0.0001$ ).                                                                                                                                                                                                  |
| 23. | Khan et al. (2016)      | A multidisciplinary VAP team was created in January 2011 and monitored bundle compliance daily during the project.                                                                            | The total bundle compliance before and after initiation of the VAP team was 90.7% and 94.2% respectively ( $p<0.001$ ).                                                                                                                                                                             |
| 24. | Mogyorodi et al. (2016) | On July 2015, the VAP bundle was implemented, and the compliance was monitored during the study.                                                                                              | Significantly improvement was achieved in HOB elevation ( $p=0.004$ ), oral care ( $p=0.01$ ), hand hygiene ( $p<0.001$ ), ET suctioning ( $p=0.004$ ) and removal of condensate ( $p=0.043$ ).                                                                                                     |
| 25. | Marini et al. (2016)    | A multidisciplinary team was initiated and trained to write the project charter and develop the driver diagram along with primary and secondary drivers                                       | Pre – intervention bundle compliance averaging: 83%<br><br>Post – intervention bundle compliance: 97%                                                                                                                                                                                               |
| 26. | Parisi et al. (2016)    | ●specialized leaflet<br><br>●lectures (every 2 weeks for 3 months)                                                                                                                            | Baseline: 13%<br><br>After intervention: 28%                                                                                                                                                                                                                                                        |

|     |                               |                                                                                                                                                                                                                                                                       |                                                                                                                                  |
|-----|-------------------------------|-----------------------------------------------------------------------------------------------------------------------------------------------------------------------------------------------------------------------------------------------------------------------|----------------------------------------------------------------------------------------------------------------------------------|
|     |                               | <ul style="list-style-type: none"> <li>●posters</li> </ul>                                                                                                                                                                                                            | (p=0.02)                                                                                                                         |
| 27. | Alvarez – Lerma et al. (2018) | 6 – hour online training course                                                                                                                                                                                                                                       | The adherence varied between the ICUs                                                                                            |
| 28. | Burja et al. (2018)           | 15-minute lectures at scheduled team meetings                                                                                                                                                                                                                         | NA                                                                                                                               |
| 29. | Landelle et al. (2018)        | <ul style="list-style-type: none"> <li>●knowledge questionnaire</li> <li>●1h educational program</li> </ul>                                                                                                                                                           | <p>Total pre – intervention phase:60%</p> <p>Intervention phase:80%</p> <p>Post – intervention phase:83.3%</p>                   |
| 30. | Cengiz et al. (2019)          | <p>Nurses’ training, at baseline &amp; 6 months later, through:</p> <ul style="list-style-type: none"> <li>●VAP information booklet</li> <li>●tests, before &amp; after training</li> <li>●posters</li> <li>●power point presentations</li> </ul>                     | NA                                                                                                                               |
| 31. | Kao et al. (2019)             | <p>Educational programs, organized by Taiwan CDC &amp; ICST, through:</p> <ul style="list-style-type: none"> <li>●checklist</li> <li>●video</li> <li>●step-by-step working handbooks</li> <li>●relevant publications</li> <li>●posters</li> <li>●protocols</li> </ul> | <p>Total:87.7%</p> <ul style="list-style-type: none"> <li>●medical centers: 83.6%</li> <li>●regional hospitals: 97.9%</li> </ul> |
| 32. | Sousa et al. (2019)           | <p>The first 2 months of intervention were devoted to education:</p> <ul style="list-style-type: none"> <li>●VAP information</li> <li>●training</li> </ul>                                                                                                            | <p>Compliance/ per intervention ranged from 94.7% to 99.8%</p> <p>Mean total compliance rate: 88.6%</p>                          |

|     |                            |                                                                                                                                                                                                |                                                                                                                                                                                                                                                                                                                                                                                                                                     |
|-----|----------------------------|------------------------------------------------------------------------------------------------------------------------------------------------------------------------------------------------|-------------------------------------------------------------------------------------------------------------------------------------------------------------------------------------------------------------------------------------------------------------------------------------------------------------------------------------------------------------------------------------------------------------------------------------|
| 33. | Branco et al. (2020)       | Continuing education program, interdisciplinary meeting among ICU professionals                                                                                                                | <p>Before &amp; after training, respectively:</p> <ul style="list-style-type: none"> <li>● position of the ventilator filter:</li> </ul> <p>94.8% vs 96.2% (p=0.074)</p> <ul style="list-style-type: none"> <li>● HOB elevation: 88.4% vs 94.5% (p=0.001)</li> <li>● oral hygiene: 89.5% vs 98.2% (p&lt;0.001)</li> <li>● teeth brushing: 80.8% vs 96.4% (p&lt;0.001)</li> <li>● cuff pressure: 92.7% vs 95.6% (p=0.002)</li> </ul> |
| 34. | Fortaleza et al. (2020)    | 2 – month medical doctors & nurses' meetings, before the intervention phase                                                                                                                    | Adherence was checked twice /week                                                                                                                                                                                                                                                                                                                                                                                                   |
| 35. | Liu et al. (2020)          | NA                                                                                                                                                                                             | <ul style="list-style-type: none"> <li>●Hand hygiene: from 71.99 to 91.97%</li> <li>●HOB elevation: from 62.02 to 85.96%</li> <li>●oral care: from 65.99 to 84.97%</li> <li>●ETT pressure: from 58.49 to 84.95%</li> <li>●subglottic suctioning: from 77.97 to 91.98%</li> <li>●sedation vacation: from 66.61 to 93.49%</li> <li>●extubation assessment: from 71.95 to 92.94%</li> </ul>                                            |
| 36. | Michelangelo et al. (2020) | <ul style="list-style-type: none"> <li>●security walks</li> <li>●question &amp; answer games</li> <li>●video with past real cases</li> <li>●simulation scenarios</li> <li>●feedback</li> </ul> | <p>Pre intervention phase: 60.8%</p> <p>Post intervention phase: 85.6%</p>                                                                                                                                                                                                                                                                                                                                                          |
| 37. | Ochoa – Hein et al. (2020) | Reeducation of physicians & nurses (from April to June 2017) through workshops                                                                                                                 | <p>2015: 54.4%</p> <p>2016: 68.1%</p> <p>2017: 70.5%</p> <p>2018: 88.3%</p>                                                                                                                                                                                                                                                                                                                                                         |

|                                                                                                                                                                                                                                                                 |                         |    |           |
|-----------------------------------------------------------------------------------------------------------------------------------------------------------------------------------------------------------------------------------------------------------------|-------------------------|----|-----------|
|                                                                                                                                                                                                                                                                 |                         |    | (p<0.001) |
| 38.                                                                                                                                                                                                                                                             | Shaban et al.<br>(2021) | NA | NA        |
| <b>Abbreviations:</b> NA: Not Applicable; ICU: Intensive Care Unit; SICU: Surgical Intensive Care Unit; VAP: Ventilator Associated Pneumonia; ETT: Endotracheal Tube; HOB: Head -of- Bed; PUD: Peptic Ulcer Disease; DVT: Deep Vein Thrombosis; I: Intervention |                         |    |           |
