# Supplementary material for: The Impact of Care Bundles on Ventilator-Associated Pneumonia (VAP) Prevention in Adult ICUs: A Systematic Review
Source: MDPI journal article supplement (doi:10.3390/antibiotics12020227), 2023-01-20
Supplement: s1 [file s1]

**Supplementary Table S1.** Risk of Bias in Non-randomized Studies of Interventions (ROBINS-I).

| Study                   |      | Pre-intervention        |                                                  | At Intervention                         | Post-intervention                                  |                          |                                 | Overall risk of bias                     |                               |
|-------------------------|------|-------------------------|--------------------------------------------------|-----------------------------------------|----------------------------------------------------|--------------------------|---------------------------------|------------------------------------------|-------------------------------|
| First Author            | Year | Bias due to confounding | Bias in selection of participants into the study | Bias in classification of interventions | Bias due to deviations from intended interventions | Bias due to missing data | Bias in measurement of outcomes | Bias in selection of the reported result | Low/moderate/serious/critical |
| <b>Al – Tawfiq</b>      | 2010 | critical                | low                                              | low                                     | serious                                            | low                      | low                             | low                                      | critical                      |
| <b>Bouadma</b>          | 2010 | moderate                | low                                              | low                                     | low                                                | low                      | low                             | low                                      | moderate                      |
| <b>Bird</b>             | 2010 | critical                | low                                              | low                                     | low                                                | low                      | critical                        | low                                      | critical                      |
| <b>Ban</b>              | 2011 | low                     | low                                              | moderate                                | moderate                                           | low                      | moderate                        | moderate                                 | moderate                      |
| <b>Berenholtz</b>       | 2011 | critical                | low                                              | low                                     | low                                                | low                      | critical                        | low                                      | critical                      |
| <b>Morris</b>           | 2011 | low                     | low                                              | low                                     | moderate                                           | low                      | moderate                        | low                                      | moderate                      |
| <b>Moore</b>            | 2012 | critical                | low                                              | low                                     | low                                                | low                      | low                             | low                                      | critical                      |
| <b>Gatell</b>           | 2012 | low                     | low                                              | low                                     | moderate                                           | low                      | low                             | low                                      | moderate                      |
| <b>Gallagher</b>        | 2012 | low                     | low                                              | low                                     | moderate                                           | low                      | low                             | low                                      | moderate                      |
| <b>Guanche – Garcel</b> | 2013 | low                     | low                                              | low                                     | moderate                                           | low                      | low                             | low                                      | moderate                      |
| <b>Leblebicioglu</b>    | 2013 | low                     | low                                              | low                                     | moderate                                           | low                      | low                             | low                                      | moderate                      |
| <b>Mehta</b>            | 2013 | low                     | low                                              | low                                     | moderate                                           | low                      | low                             | low                                      | moderate                      |
| <b>Micik</b>            | 2013 | critical                | low                                              | low                                     | serious                                            | low                      | critical                        | critical                                 | critical                      |
| <b>Viana</b>            | 2013 | low                     | low                                              | low                                     | moderate                                           | low                      | low                             | low                                      | moderate                      |
| <b>Chen</b>             | 2014 | low                     | low                                              | low                                     | low                                                | low                      | low                             | low                                      | low                           |
| <b>Dosher</b>           | 2014 | moderate                | low                                              | low                                     | low                                                | low                      | low                             | low                                      | moderate                      |
| <b>Eom</b>              | 2014 | low                     | low                                              | low                                     | low                                                | low                      | low                             | low                                      | low                           |
| <b>Righi</b>            | 2014 | low                     | low                                              | low                                     | low                                                | low                      | moderate                        | low                                      | moderate                      |
| <b>Ismail</b>           | 2015 | low                     | low                                              | low                                     | low                                                | low                      | moderate                        | low                                      | moderate                      |
| <b>Lim</b>              | 2015 | moderate                | low                                              | low                                     | serious                                            | low                      | low                             | low                                      | serious                       |
| <b>Zeng</b>             | 2015 | low                     | low                                              | low                                     | serious                                            | low                      | moderate                        | low                                      | serious                       |
| <b>Alcan</b>            | 2016 | low                     | low                                              | low                                     | low                                                | low                      | moderate                        | low                                      | moderate                      |
| <b>Khan</b>             | 2016 | low                     | low                                              | low                                     | low                                                | low                      | low                             | low                                      | low                           |
| <b>Mogyorodi</b>        | 2016 | low                     | low                                              | low                                     | low                                                | low                      | low                             | low                                      | low                           |
| <b>Marini</b>           | 2016 | serious                 | low                                              | low                                     | low                                                | low                      | moderate                        | low                                      | serious                       |
| <b>Parisi</b>           | 2016 | low                     | low                                              | low                                     | serious                                            | low                      | moderate                        | low                                      | serious                       |
| <b>Alvarez – Lerma</b>  | 2018 | low                     | low                                              | low                                     | moderate                                           | low                      | moderate                        | moderate                                 | moderate                      |
| <b>Burja</b>            | 2018 | low                     | low                                              | low                                     | low                                                | low                      | moderate                        | low                                      | moderate                      |
| <b>Landelle</b>         | 2018 | low                     | low                                              | low                                     | low                                                | low                      | low                             | low                                      | low                           |
| <b>Kao</b>              | 2019 | moderate                | low                                              | low                                     | low                                                | low                      | low                             | low                                      | moderate                      |
| <b>Cengiz</b>           | 2019 | low                     | low                                              | low                                     | low                                                | low                      | low                             | low                                      | low                           |
| <b>Sousa</b>            | 2019 | low                     | low                                              | low                                     | low                                                | low                      | low                             | low                                      | low                           |
| <b>Branco</b>           | 2020 | serious                 | low                                              | low                                     | critical                                           | low                      | low                             | low                                      | critical                      |
| <b>Fortaleza</b>        | 2020 | moderate                | low                                              | low                                     | serious                                            | low                      | moderate                        | low                                      | serious                       |
| <b>Liu</b>              | 2020 | low                     | low                                              | low                                     | moderate                                           | low                      | moderate                        | low                                      | moderate                      |
| <b>Michelangelo</b>     | 2020 | low                     | low                                              | low                                     | moderate                                           | low                      | moderate                        | low                                      | moderate                      |
| <b>Ochoa – Hein</b>     | 2020 | moderate                | low                                              | low                                     | moderate                                           | low                      | low                             | low                                      | moderate                      |
| <b>Shaban</b>           | 2021 | low                     | low                                              | low                                     | moderate                                           | low                      | moderate                        | low                                      | moderate                      |
